# Supplementary material
Source: HighWire-hosted journal article supplement (https://jhr.uwpress.org/highwire/filestream/1475/field_highwire_adjunct_files/0/JHRv54n04_article08_DepewSwensen_OnlineApp.pdf)
Supplement: JHRv54n04_article08_DepewSwensen_OnlineApp.pdf [file JHRv54n04_article08_DepewSwensen_OnlineApp.pdf]

## **Supplementary Online Appendix**

Table A1  
 OLS and Negative Binomial Estimates in Cities Below the Median  
 Population

|                                        | (1)                | (2)                 | (3)                | (4)                 |
|----------------------------------------|--------------------|---------------------|--------------------|---------------------|
|                                        | Rates              | Levels              | Indicators         |                     |
| <b>Panel A: Ordinary Least Squares</b> |                    |                     |                    |                     |
| Homicides last month                   | 0.075*<br>(0.041)  | 0.242**<br>(0.107)  | 0.238**<br>(0.108) |                     |
| Homicides two months prior             | 0.113**<br>(0.047) | 0.299**<br>(0.138)  | 0.333**<br>(0.151) |                     |
| Homicide previous two months           |                    |                     |                    | 0.315***<br>(0.112) |
| Number of observations                 | 14,880             | 14,880              | 14,880             | 14,880              |
| <b>Panel B: Negative Binomial</b>      |                    |                     |                    |                     |
| All                                    |                    |                     |                    |                     |
| Homicides last month                   | 0.033**<br>(0.016) | 0.097***<br>(0.036) | 0.093**<br>(0.038) |                     |
| Homicides two months prior             | 0.030*<br>(0.017)  | 0.074*<br>(0.042)   | 0.080*<br>(0.045)  |                     |
| Homicide previous two months           |                    |                     |                    | 0.094***<br>(0.035) |
| Number of observations                 | 14,880             | 14,880              | 14,880             | 14,880              |
| Month FE                               | Yes                | Yes                 | Yes                | Yes                 |
| City-by-Year FE                        | Yes                | Yes                 | Yes                | Yes                 |

Notes: Estimates in Panel A are based on OLS regression models and estimates in Panel B use Negative Binomial regression models. Each regression uses monthly data on homicides from the North Carolina State Center for Health Statistics and concealed-carry permit applications from the North Carolina State Bureau of Investigations. The sample is limited to cities below the median population in the data. The outcome variable is the number of new concealed-carry permit applications for a given city in a given month. Standard errors (in parentheses) are corrected for possible clustering at the city level.

\* 0.10, \*\* 0.05 and \*\*\*0.01 denote significance levels.

Table A2  
Dynamic Effects on Concealed-Carry Applications

|                            | (1)                 | (2)                 | (3)                 | (4)                 | (5)                |
|----------------------------|---------------------|---------------------|---------------------|---------------------|--------------------|
| Homicide 3-5 months after  |                     |                     |                     | -0.044<br>(0.027)   | -0.031<br>(0.034)  |
| Homicide 0-2 months after  |                     |                     | 0.012<br>(0.031)    | -0.000<br>(0.034)   | 0.017<br>(0.041)   |
| Homicide prior 1-2 months  | 0.124***<br>(0.036) | 0.126***<br>(0.036) | 0.126***<br>(0.038) | 0.117***<br>(0.039) | 0.102**<br>(0.041) |
| Homicide prior 3-5 months  |                     | 0.008<br>(0.026)    |                     |                     | 0.012<br>(0.031)   |
| Month Fixed Effects        | Yes                 | Yes                 | Yes                 | Yes                 | Yes                |
| City by Year Fixed Effects | Yes                 | Yes                 | Yes                 | Yes                 | Yes                |
| Number of observations     | 14,880              | 14,880              | 14,880              | 14,880              | 14,880             |

Notes: Estimates are based on Poisson models using monthly data on homicides from the North Carolina State Center for Health Statistics and concealed-carry permit applications from the North Carolina State Bureau of Investigations. The outcome variable is the number of new concealed-carry permit applications for a given city in a given month. Standard errors (in parentheses) are corrected for possible clustering at the city level.

\* 0.10, \*\* 0.05 and \*\*\*0.01 denote significance levels.

Table A3  
Estimated Effects by Victim Salience (Race-by-Gender)

|                        | (1)                      | (2)                      | (3)                        | (4)                        |
|------------------------|--------------------------|--------------------------|----------------------------|----------------------------|
|                        | Black-Male<br>Applicants | White-Male<br>Applicants | Black-Female<br>Applicants | White-Female<br>Applicants |
| Black-Male Victim      | 0.115<br>(0.110)         | 0.187***<br>(0.051)      | -0.210<br>(0.310)          | 0.133<br>(0.102)           |
| White-Male Victim      | 0.021<br>(0.180)         | 0.118**<br>(0.053)       | -0.087<br>(0.556)          | -0.041<br>(0.100)          |
| Black-Female Victim    | -0.534<br>(0.444)        | 0.173*<br>(0.095)        | 0.920**<br>(0.465)         | 0.263<br>(0.206)           |
| White-Female Victim    | -0.421<br>(0.388)        | -0.018<br>(0.070)        | 0.664<br>(0.587)           | 0.134<br>(0.137)           |
| Month FE               | Yes                      | Yes                      | Yes                        | Yes                        |
| City by Year FE        | Yes                      | Yes                      | Yes                        | Yes                        |
| Number of observations | 7,812                    | 14,676                   | 2,916                      | 12,240                     |

Notes: Estimates are based on Poisson models using monthly data on homicides from the North Carolina State Center for Health Statistics and concealed-carry permit applications from the North Carolina State Bureau of Investigations. The outcome variable is the demographic-specific number of new concealed-carry permit applications for a given city in a given month corresponding to the column titles. Standard errors (in parentheses) are corrected for possible clustering at the city level.

\* 0.10, \*\* 0.05 and \*\*\*0.01 denote significance levels.

Table A4  
Estimated Effects using Zip Code-Level Data by Applicant Characteristics

|                           | (1)               | (2)               | (3)                | (4)                | (5)              | (6)              | (7)               | (8)               |
|---------------------------|-------------------|-------------------|--------------------|--------------------|------------------|------------------|-------------------|-------------------|
|                           | All               | Black             | White              | Male               | Female           | Ages 21-39       | Ages 40-59        | Ages 60+          |
| Homicide this month       | 0.008<br>(0.009)  | 0.019<br>(0.023)  | 0.004<br>(0.010)   | 0.009<br>(0.009)   | 0.002<br>(0.017) | 0.013<br>(0.012) | 0.005<br>(0.012)  | 0.006<br>(0.018)  |
| Homicide last month       | 0.017*<br>(0.009) | -0.025<br>(0.023) | 0.023**<br>(0.011) | 0.021**<br>(0.010) | 0.003<br>(0.016) | 0.017<br>(0.013) | 0.022*<br>(0.012) | 0.008<br>(0.018)  |
| Homicide two months prior | -0.001<br>(0.009) | 0.007<br>(0.025)  | -0.002<br>(0.009)  | -0.002<br>(0.009)  | 0.003<br>(0.016) | 0.009<br>(0.012) | -0.009<br>(0.012) | -0.001<br>(0.017) |
| Month FE                  | Yes               | Yes               | Yes                | Yes                | Yes              | Yes              | Yes               | Yes               |
| City by Year FE           | Yes               | Yes               | Yes                | Yes                | Yes              | Yes              | Yes               | Yes               |
| Number of observations    | 128,520           | 56,784            | 126,876            | 127,128            | 98,328           | 109,524          | 117,264           | 99,300            |

Notes: These estimates are based on Poisson models using homicide data from the North Carolina State Center for Health Statistics and concealed-carry permit applications from the North Carolina State Bureau of Investigations. The outcome variable is the demographic-specific number of new concealed-carry permit applications for a given zip code in a given city in a given month corresponding to the column titles. Standard errors (in parentheses) are corrected for possible clustering at the city level.

\* 0.10, \*\* 0.05 and \*\*\*0.01 denote significance levels.

Table A5  
Dynamic Effects at the Census Tract Level

|                           | (1)                | (2)                | (3)               | (4)               | (5)               |
|---------------------------|--------------------|--------------------|-------------------|-------------------|-------------------|
| Homicide 3-5 months after |                    |                    |                   | -0.049<br>(0.046) | -0.071<br>(0.049) |
| Homicide 0-2 months after |                    |                    | -0.038<br>(0.041) |                   | -0.064<br>(0.046) |
| Homicide prior 1-2 months | 0.075**<br>(0.038) | 0.077**<br>(0.037) | 0.066*<br>(0.040) | 0.066*<br>(0.037) | 0.043<br>(0.040)  |
| Homicide prior 3-5 months |                    | 0.011<br>(0.046)   |                   |                   | -0.015<br>(0.052) |
| Month FE                  | Yes                | Yes                | Yes               | Yes               | Yes               |
| City-by-Year FE           | Yes                | Yes                | Yes               | Yes               | Yes               |
| Number of observations    | 27,884             | 27,884             | 27,884            | 27,884            | 27,884            |

Notes: These estimates are based on Poisson models using crime data from the North Carolina law enforcement agencies and concealed-carry permit applications from the North Carolina State Bureau of Investigations. The outcome variable is the number of new concealed-carry permit applications in a given census tract in a given city in a given month. Standard errors (in parentheses) are corrected for possible clustering at the census tract level.

\* 0.10, \*\* 0.05 and \*\*\*0.01 denote significance levels.

Table A6  
Estimated Effects by Homicides (NCSCHS and UCR Data)

|                              | (1)      | (2)      | (3)      | (4)      |
|------------------------------|----------|----------|----------|----------|
|                              | NCSCHS   |          | UCR      |          |
| Homicide this month          | 0.135*** |          | 0.206*** |          |
|                              | (0.037)  |          | (0.042)  |          |
| Homicide this month          | 0.122**  |          | 0.123**  |          |
|                              | (0.057)  |          | (0.056)  |          |
| Homicide previous two months |          | 0.140*** |          | 0.172*** |
|                              |          | (0.039)  |          | (0.042)  |
| Month FE                     | Yes      | Yes      | Yes      | Yes      |
| City by Year FE              | Yes      | Yes      | Yes      | Yes      |
| Number of observations       | 11,467   | 11,467   | 11,467   | 11,467   |

Notes: Estimates are based on Poisson models using monthly data on homicides from the North Carolina State Center for Health Statistics and Uniform Crime Reports. Data on concealed-carry permit applications from the North Carolina State Bureau of Investigations. The outcome variable is the number of new concealed-carry permit applications for a given city in a given month. Columns 1 and 2 present the results when the NCSCHS data is restricted to the same city-month observations that we observe in the UCR data. Standard errors (in parentheses) are corrected for possible clustering at the city level.

\* 0.10, \*\* 0.05 and \*\*\*0.01 denote significance levels.
